1 **EvolvingSTEM: A microbial evolution-in-action curriculum that enhances learning**  
2 **of evolutionary biology and increases interest in STEM**

3

4 Vaughn S. Cooper<sup>1,2,3,5</sup>, Taylor M. Warren<sup>3</sup>, Abigail M. Matela<sup>1,2</sup>, Michael Handwork<sup>4</sup>,  
5 Shani Scarponi<sup>4</sup>

6

7 1: Department of Microbiology and Molecular Genetics, and 2: Center for Evolutionary  
8 Biology and Medicine, University of Pittsburgh, School of Medicine, Pittsburgh, PA USA

9

10 3: Department of Molecular, Cellular, and Biomedical Sciences, University of New  
11 Hampshire, Durham, NH USA

12

13 4: Winnacunnet High School, Hampton, NH USA

14

15 5: Corresponding author: [vaughn.cooper@pitt.edu](mailto:vaughn.cooper@pitt.edu)

16

17

18

19 **Abstract**

20

21 Evolution is a central, unifying theory for all of life science, yet the subject is  
22 poorly represented in most secondary-school biology courses, especially in the United  
23 States. One challenge to learning evolution is that it is taught as a conceptual,  
24 retrospective subject with few tangible outcomes for students. These typical passive  
25 learning strategies lead to student disengagement with the material and  
26 misunderstanding of evolutionary concepts. To promote greater investment and  
27 comprehension, we developed EvolvingSTEM, an inquiry-based laboratory curriculum  
28 that demonstrates concepts of natural selection, heredity, and ecological diversity  
29 through experimental evolution of a benign bacterium. Students transfer populations of  
30 *Pseudomonas fluorescens* growing on plastic beads, which selects for biofilm formation  
31 and mutants with new, conspicuous phenotypes. We introduced our curriculum to four  
32 introductory high school biology classes alongside their standard curriculum materials  
33 and found that students who learned evolution through EvolvingSTEM scored  
34 significantly better on a common assessment targeted to Next Generation Science  
35 Standards than students taught only the standard curriculum. This latter group  
36 subsequently achieved similar scores once they too completed our curriculum. Our work  
37 demonstrates that inquiry-based, hands-on experiences with evolving bacterial  
38 populations can greatly enhance student learning of evolutionary concepts.

39

## 40 **Introduction**

41           Understanding evolutionary processes is fundamental to all areas of life science  
42 because evolution serves as a conceptual framework to organize other life science  
43 topics, such as organismal diversity and ecological interactions. Furthermore, some of  
44 the most significant threats to human health are evolutionary phenomena; therefore,  
45 knowledge of evolutionary processes has a direct impact on public health and medicine  
46 (Wells et al. 2017). For example, antimicrobial resistance and cancer are caused by the  
47 rapid evolution of microbes and our own cells, respectively (Karatan and Watnick 2009;  
48 Greaves and Maley 2012; Berendonk et al. 2015; Makohon-Moore and Iacobuzio-  
49 Donahue 2016; Alizon and Méthot 2018). In addition, ongoing revolutions in  
50 biotechnology and personalized medicine, such as gene-editing (i.e., CRISPR), can  
51 only be understood in the context of the evolutionary concept of descent from a shared  
52 ancestral lineage (Makarova et al. 2015; Knott and Doudna 2018). A strong knowledge  
53 base of evolution is therefore invaluable for a literate society to understand scientific  
54 and medical advances and for a prepared workforce to excel in jobs in science,  
55 technology, and engineering. The value of evolutionary biology knowledge is highlighted  
56 by its inclusion as a core concept for STEM education practices (National Research  
57 Council 2012; NGSS Lead States 2013; NSTA 2013).

58  
59           Although the importance of evolutionary biology is well-established,  
60 misconceptions of its basic principles remain prevalent among students, the general  
61 public, and even the teachers who are providing instruction (Cunningham and Wescott  
62 2009; Gregory 2009; Sickel and Friedrichsen 2013; Yates and Marek 2014; Glaze and  
63 Goldston 2015). While many coexisting factors likely contribute to poor understanding  
64 (Smith 2010a; 2010b; Pobiner 2016), one potential reason that evolutionary concepts  
65 are misunderstood is that typical curricula use passive learning strategies, where  
66 instruction relies on lectures and textbook readings. Current evolution curriculum design  
67 runs counter to evidence that student-centered, active learning strategies are the most  
68 effective method for science teaching and have been shown to improve student  
69 understanding of evolutionary concepts (Nehm and Reilly 2007; Nelson 2008; Freeman

70 et al. 2014; Romine et al. 2017). Courses that provide students with authentic research  
71 experiences are especially effective at increasing student engagement and promoting a  
72 deeper understanding of evolution (Jordan et al. 2014; Ratcliff et al. 2014; Broder et al.  
73 2018).

74  
75         There is therefore a critical need for engaging and informative evolutionary  
76 biology curricula that provide young students the opportunity to explore the concept of  
77 changing frequencies of inherited traits just as they attempt to quantify gravity in physics  
78 or acid-base reactions in chemistry. To meet this need, we developed EvolvingSTEM, a  
79 curriculum that provides hands-on, inquiry-based learning of evolution, microbiology,  
80 ecology, and heredity with an experiment that employs real scientific research practices.  
81 EvolvingSTEM allows students to visualize evolutionary adaptations arising in real time  
82 by growing populations of the harmless bacterium *Pseudomonas fluorescens* under  
83 conditions that select for the formation of a biofilm. A biofilm is a surface dwelling  
84 community of microbes encased in a protective coating of self-produced polymers;  
85 biofilms are the dominant form of microbial life (Costerton et al. 1987). They are also  
86 structured, heterogeneous environments that include varied ecological niches (Karatan  
87 and Watnick 2009). Bacteria with advantageous mutations colonize these niches, and  
88 their adaptations cause visible differences in colony morphology from the ancestral  
89 genotype (Rainey and Travisano 1998; Flynn et al. 2016). This evolution-in-action  
90 occurs within days, requires little specialized equipment, and can be offered in any  
91 classroom laboratory that can support sterile technique. Our curriculum is intended to  
92 replace standard, passive learning curricula to meet competencies for natural selection  
93 and evolution described in the Next-Generation Science Standards (HS-LS4, (NGSS  
94 Lead States 2013)). We hypothesized that students who learn evolutionary concepts  
95 with our curriculum would have significant increases in content knowledge relative to  
96 students that were provided only the standard curriculum.

97

98

## 99 Results

### 100 ***Developing and refining an amenable protocol for teaching bacterial evolution to*** 101 ***high school students***

102 The idea to teach evolutionary concepts to high school students with a bacterial  
103 evolution experiment grew from our research on identifying the causes of rapidly  
104 evolving mutant colony morphologies of the opportunistic pathogens *Burkholderia*  
105 *cenocepacia* and *Pseudomonas aeruginosa* (Poltak and Cooper 2011; Flynn et al.  
106 2016). These species are particularly threatening to persons with cystic fibrosis, where  
107 they cause chronic airway infections by forming biofilms (Starkey et al. 2009; Ashish et  
108 al. 2013). Biofilm-associated infections are inherently more resistant to host immunity  
109 and antimicrobials because secreted adhesive polymers are protective and the cells  
110 within grow more slowly (Harrison et al. 2005). Eventually, some bacteria disperse from  
111 the colony, either as individuals or clusters, to inhabit new surfaces and resume the  
112 biofilm lifecycle (Poltak and Cooper 2011; Martin et al. 2016).

113  
114 In order to study the dynamics of bacterial evolution *in vitro*, we developed a  
115 simple method to model the biofilm lifecycle of surface attachment, biofilm formation,  
116 dispersal, and recolonization (Figure 1, (Poltak and Cooper 2011; Traverse et al. 2013;  
117 O'Rourke et al. 2015; Flynn et al. 2016; Turner et al. 2018). In short, we culture bacteria  
118 for 24 hours in test tubes containing growth media and a polystyrene bead. A subset of  
119 the bacteria colonize the bead and form a biofilm. We then transfer only the biofilm-  
120 covered bead to a new tube with a fresh bead. We repeat this process daily to select for  
121 bacterial mutants that are best adapted to aspects of the entire biofilm lifecycle.  
122 Conveniently, we found that biofilm adapted mutants also display altered colony  
123 morphologies when grown on agar plates, making them conspicuous to students.

124  
125 In collaboration with science teachers at Winnacunnet High School (Hampton,  
126 NH), we modified our research laboratory protocol to accommodate implementation in a  
127 high school classroom. We selected the plant probiotic bacterium, *Pseudomonas*  
128 *fluorescens* SBW25, as our study subject because it had several qualities that made it a

129 good candidate for use in a high school classroom: (1) it is benign, and thus safe for  
130 students with no microbiology experience, (2) it had previously been suggested as a  
131 good candidate for use in educational settings (Green et al. 2011; Spiers 2014), and (3)  
132 it is the subject of a large body of research on its capacity for rapid and conspicuous  
133 adaptive evolution in biofilm-related conditions (Rainey and Travisano 1998; Spiers  
134 2005). Adaptive *P. fluorescens* mutants are often characterized by rugose or rosette-like  
135 colony morphologies resulting from greater production of polysaccharides for  
136 attachment (Rainey et al. 2000). We found that experimental evolution of *P. fluorescens*  
137 SBW25 in the biofilm lifecycle model selected for a high frequency of adaptive mutants  
138 with novel colony morphologies in less than two weeks.

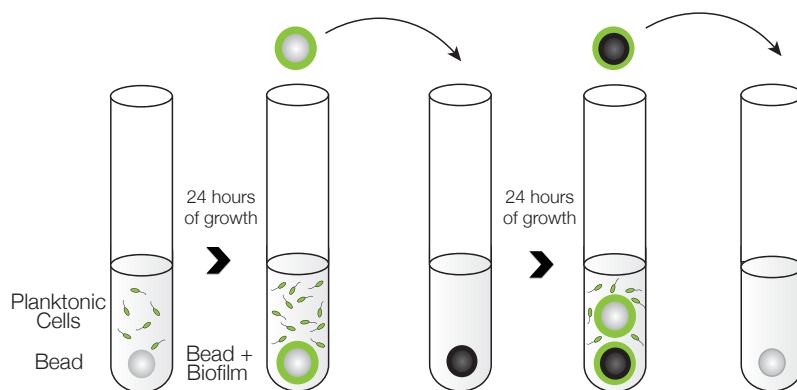

Fig. 1. Biofilm lifecycle model. Bacteria are grown in test tubes with plastic beads on which biofilm forms. Daily bead transfers select for bacterial attachment, assembly, dispersal, and reattachment. Figure adapted from (Turner et al. 2018).

139  
140

141 To accelerate this process and ensure that our experiment could be performed  
142 within the timeframe of a high school biology lesson, we conducted a series of trials in  
143 different media to determine conditions that resulted in predictable, rapid adaptations.  
144 We found that growth in King's B medium (KB) generated multiple, heritable colony  
145 phenotypes within seven days. In the interest of accelerating the evolutionary dynamics,  
146 we repeated the experiment in KB medium with various glycerol concentrations. We  
147 found that an increase from 1.5% to 2.0% glycerol selected for novel colony  
148 morphologies at detectable frequencies in four days. We named this modified media  
149 recipe "Queen's B" (QB) and used this recipe thereafter. Media recipes are available as  
150 a supplemental file (Supplemental File 1).

151

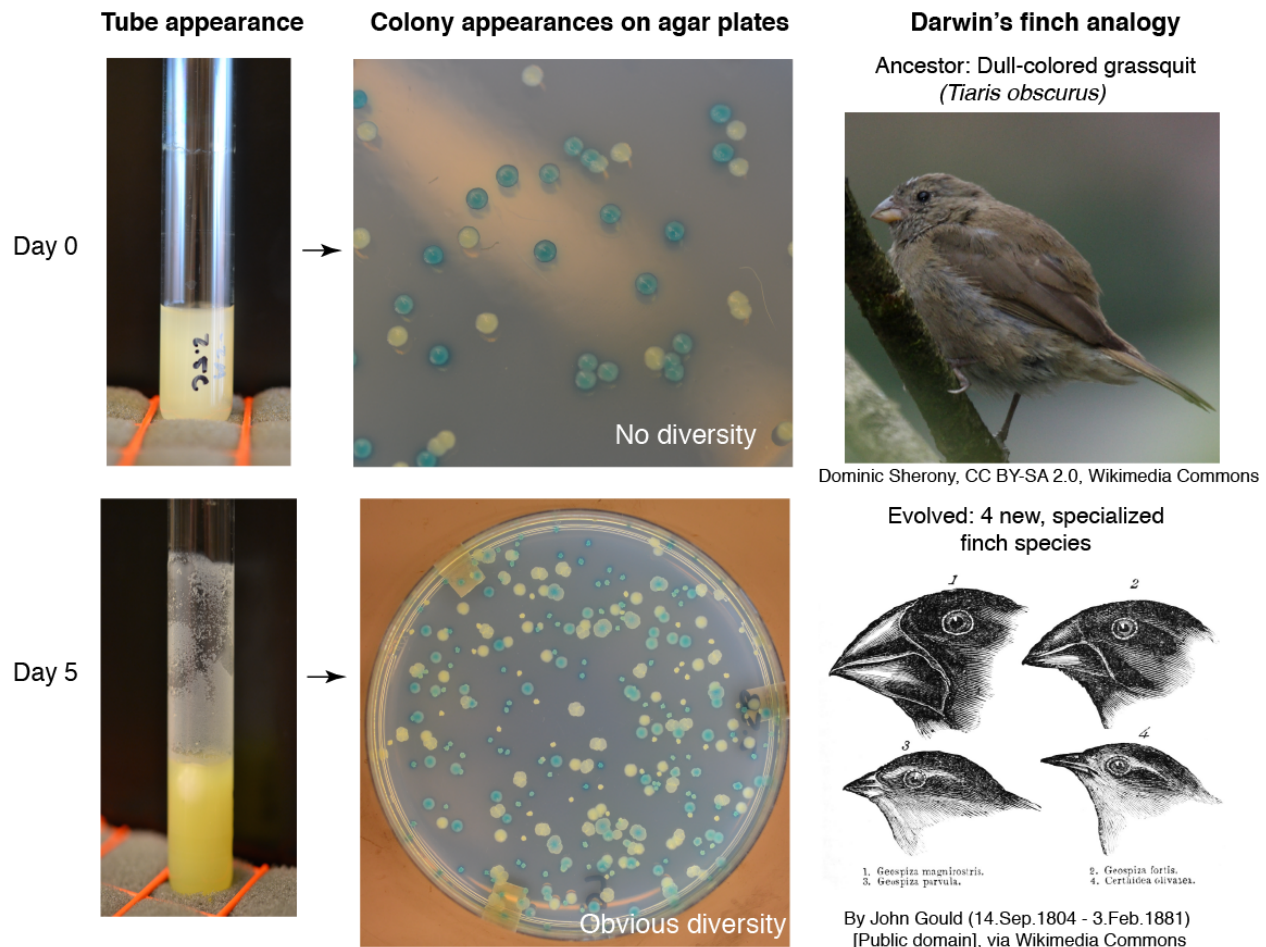

152

Fig. 2. Adaptation to biofilm selection can occur within days and produce conspicuous phenotypic differences. Populations were founded with equal ratios of Lac+ (blue) and Lac- (white) ancestral genotypes that do not differ in morphology. After 5-7 days, new colony morphologies evolve and represent different biofilm-associated ecological strategies, as different beak shapes of Darwin's finches represent distinct feeding strategies (Rainey and Travisano 1998, Poltak and Cooper 2011).

153

154 Students can use our modified protocol to guide an inquiry-based experiment  
155 that allows them to visualize evolution in their bacterial populations in only six class  
156 periods (Fig 2). For example, on Monday, students inoculate glass test tubes containing  
157 QB media and a polystyrene bead with a clone of *P. fluorescens* SBW25, and then  
158 perform bead transfers for the following three days (Tuesday-Thursday). During the  
159 process of bead transfer, students can identify effects of natural selection by observing  
160 increased biofilm production on the walls of their test tubes. In addition, at the beginning

161 and end of the week, students sample their populations by growing individual bacterial  
162 colonies on agar plates. Students can make observations of mutant colonies on the  
163 Monday of the following week and compare these colonies to those of the ancestral  
164 population that were plated earlier in the week. Students can be given additional  
165 curriculum materials, such as homework and pretests, to prepare them for each step in  
166 the laboratory protocol and provide opportunities for them to link the heritable, adaptive  
167 evolutionary change they observe in their experiment to the evolutionary processes that  
168 produced this dynamic. Through EvolvingSTEM, students can acquire the knowledge to  
169 meet Next Generation Science Standards for Natural Selection and Evolution (Box 1;  
170 (NGSS Lead States 2013)). Curriculum materials are available as supplemental files  
171 (Supplemental File 2-3).

172

### 173 ***Learning outcomes***

174 The exact outcome of any individual experiment is unknown because the biofilm  
175 selection acts on randomly occurring mutations in the bacterial populations that were  
176 founded from a single clone. In fact, this variability among these independent “replays”  
177 of evolution is realistic and demonstrates effects of chance and contingency on  
178 evolution (Blount et al. 2018). Nonetheless, student groups propagate multiple  
179 populations in different culture tubes under identical experimental conditions, and this  
180 replication means they are very likely to see mutants with novel morphologies in at least  
181 one experimental population. In addition, students compare their experimental  
182 populations to a control population that does not contain the bead and therefore is not  
183 under selection for increased biofilm production. Students can examine the phenotypes  
184 found in each population over time, compare their findings to those of other classmates,  
185 and develop their own explanations for their observations. This allows students to apply  
186 the comparative method of evolutionary biology and begin the process of scientific  
187 inquiry. Students are encouraged to consider why their replicate populations vary and  
188 propose reasons for that variation, ranging from experimental error, to peculiarities of  
189 the bead transfers, to genuine evolutionary randomness.

190



191 **Box 1. Next Generation Science Standards (NGSS) Targeted by EvolvingSTEM.**  
192 NGSS (2013) are based on *A Framework for K-12 Science Education: Practices,*  
193 *Crosscutting Concepts, and Core Ideas* (National Research Council 2012) and  
194 designed through a collaboration between 26 states, the National Research Council, the  
195 National Science Teachers Association, the American Association for the Advancement  
196 of Science, and Achieve, Inc.

197  
198 EvolvingSTEM provides students with the knowledge to meet the following NGSS HS-  
199 LS4 standards:

- 200 1. Communicate scientific information that common ancestry and biological evolution are supported by  
201 multiple lines of empirical evidence.
- 202 2. Construct an explanation based on evidence that the process of evolution primarily results from four  
203 factors: (1) the potential for a species to increase in number, (2) the heritable genetic variation of  
204 individuals in a species due to mutation and sexual reproduction, (3) competition for limited  
205 resources, and (4) the proliferation of those organisms that are better able to survive and reproduce  
206 in the environment.
- 207 3. Apply concepts of statistics and probability to support explanations that organisms with an  
208 advantageous heritable trait tend to increase in proportion to organisms lacking this trait.
- 209 4. Construct an explanation based on evidence for how natural selection leads to adaptation of  
210 populations.
- 211 5. Evaluate the evidence supporting claims that changes in environmental conditions may result in (1)  
212 increases in the number of individuals of some species, (2) the emergence of new species over time,  
213 and (3) the extinction of other species.

214  
215 As an example, for HS-LS4-2, students will learn:

- 216 • Random mutation results in genetic variation between members of a population.
- 217 • Genetic variation can result in trait variation that leads to performance differences among individuals.
- 218 • Competition for limited resources results in differential survival. Individuals with more favorable  
219 phenotypes are more likely to survive and reproduce, thus passing traits to subsequent generations.
- 220 • Evolutionary fitness is measured by reproductive success.
- 221 • An adaptation is a heritable genetic variant manifested as a trait that provides an advantage to an  
222 individual in a particular environment.
- 223 • In addition to natural selection, chance and random events can influence the evolutionary process,  
224 especially for small populations.

225  
226 In addition, students will be skilled at:

- 227 • Developing experimental investigations that can be used to test specific hypotheses.
- 228 • Evaluating evidence to qualitatively and quantitatively investigate the role of natural selection in  
229 evolution.
- 230 • Constructing evidence-based explanations that the process of evolution is a consequence of the  
231 interaction of four factors: (1) the potential for population size to increase, (2) genetic variation, (3)  
232 competition for resources, and (4) proliferation of individuals better able to survive and reproduce in a  
233 particular environment.
- 234 • Applying basic mathematics to calculate the fitness advantages of selected mutants and/or to  
235 compare differences in levels of biofilm production.
- 236 • Developing generalizations of the results obtained and/or the experimental design and applying them  
237 to new problems, including the design of new experiments and interpreting results in the context of  
238 natural and infectious bacterial biofilms.

239

240           The speed of adaptation in biofilm models results from strong selection for more  
241   adherent mutants that bind not only the provided surface (e.g. polystyrene), but also  
242   other attached bacteria or secreted substances. Consequently, selection often favors  
243   the evolution of diverse, conspicuous phenotypes within each tube and not just a single,  
244   more adherent type. This result not only simulates the process of adaptive radiation  
245   often illustrated using Darwin’s finches in textbooks (Figure 2), but also reproduces the  
246   selection for traits associated with adherence that often occurs during biofilm-associated  
247   infections (Traverse et al. 2013; Cooper et al. 2014; O’Rourke et al. 2015; Gloag et al.  
248   2018). The “wrinkly” colony morphologies that evolve in our model are genetically and  
249   functionally identical to those commonly isolated from infections of the related species  
250   *Pseudomonas aeruginosa* in the airways of cystic fibrosis patients and in chronic skin  
251   wounds (Gloag et al. 2018(Starkey et al. 2009)). Students can therefore connect their  
252   classroom experiments to recent findings at the interface of evolutionary biology and  
253   medicine to see how basic biological research impacts their everyday lives.  
254   Furthermore, making connections from classroom activities to real-world examples can  
255   increase students’ evolutionary understanding and engagement (Beardsley et al. 2011;  
256   Infanti and Wiles 2014).

257

### 258   ***Assessment of student learning***

259           We used a delayed intervention approach to assess learning in 4 classes of 9<sup>th</sup>  
260   grade biology honors students at Winnacunnet High School, a suburban public high  
261   school in New England. Group 1 included classroom A, taught by MH, and classroom B,  
262   taught by SS. This group used an earlier version of our EvolvingSTEM curriculum that  
263   did not use a control population alongside their standard curriculum materials, which  
264   included textbook readings, lectures, and an educational video. Group 2 included  
265   classrooms C and D, both taught by SS. This group first received the standard  
266   curriculum with additional lecture materials, followed by EvolvingSTEM (Table 1).  
267   Students conducted the experiments and analyses for our curriculum in groups of three  
268   or four individuals, requiring collaborative teamwork.

269

270 A knowledge assessment was used to determine whether students achieved an  
271 increased understanding of evolutionary concepts. The test consisted of multiple choice  
272 and free response questions to address student learning across multiple categories of  
273 Bloom's Taxonomy of cognitive domains, which evaluates student knowledge gains at  
274 hierarchical levels of complexity (Zoller 1993; Crowe et al. 2008). Test questions were  
275 devised to directly assess whether students met NGSS (2013) performance  
276 expectations HS-LS4-1,2,3, and 5. We developed a grading rubric for the free response  
277 questions based on templates suggested by Wiggins and McTighe (2005) that required  
278 answers with accurate information, specific vocabulary, and a well-structured defense  
279 that incorporated outside examples (Wiggins and McTighe 2005). Our assessment and  
280 grading rubric are available as supplemental files (Supplemental File 4).

281

| Group | Class – Teacher | Number of Students per Class | Total Number of Students per Group |
|-------|-----------------|------------------------------|------------------------------------|
| 1     | A – Teacher MH  | 19                           | 41                                 |
|       | B – Teacher SS  | 22                           |                                    |
| 2     | C – Teacher SS  | 18                           | 37                                 |
|       | D – Teacher SS  | 19                           |                                    |

282

283 **Table 1: Composition of Study Groups.**

284

285 Pretests were given to both groups prior to the start of classroom evolution  
286 activities. Group 1 students were given a posttest after completing the EvolvingSTEM  
287 curriculum. Group 2 students were given a midtest after completing the standard  
288 curriculum, and then a posttest after completing EvolvingSTEM. We found no significant  
289 difference between the average pretest score of Group 1 and Group 2 students (13.17  
290 (26%) vs. 12.5 (25%) out of 50 points total;  $t=0.60$ ,  $p=n.s.$ ), indicating that all students  
291 began with a similar knowledge base (Fig. 3). Quantitative analyses of student  
292 knowledge gains revealed that students who completed EvolvingSTEM (Group 1)  
293 showed significant improvement on their average posttest scores, with an average gain  
294 of 19.16 points, thereby increasing their overall score by 38% between the pre- and  
295 posttest ( $t=16.61$ ,  $p<0.0001$ ). Students provided the standard curriculum (Group 2) also

296 showed significant improvement on their average midtest score, which increased by  
297 10.14 points ( $t= 9.72$ ,  $p<0.0001$ ), resulting in an overall increase of 21% between pre-  
298 and midtest. Although both student groups showed improvement, Group 1 achieved  
299 significantly higher average test scores after completing EvolvingSTEM than Group 2  
300 did after completing the standard curriculum ( $t=5.87$ ,  $p<0.0001$ ). Students who learned  
301 evolution with EvolvingSTEM therefore achieved significantly greater gains in  
302 comprehension of evolution than students who learned it from the standard curriculum.  
303

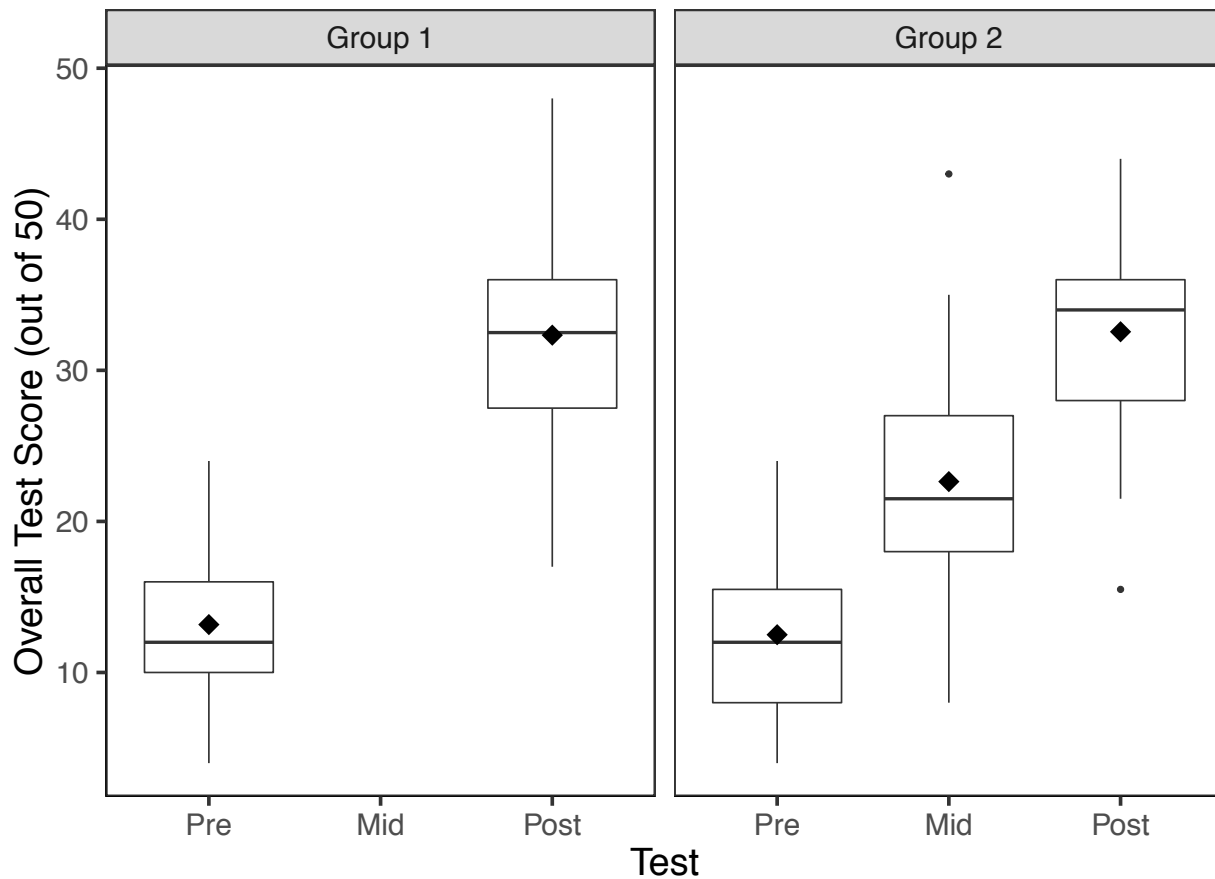

304

Fig. 3. Boxplot of student assessment scores. The EvolvingSTEM curriculum produces significantly greater gains in comprehension of NGSS topic HS-LS-4 than the standard curriculum (Group 1 Post vs Group 2 Mid,  $t=5.87$ ,  $p<0.0001$ ). After experiencing our curriculum, Group 2 students subsequently achieved equivalent scores to Group 1 students (Group 1 Post vs Group 2 Post,  $t=0.14$ , ns). Mean values are indicated with diamonds.

305

306           Once students in Group 2 were exposed to EvolvingSTEM, their average  
307 posttest scores had an overall increase of 20% in comparison to their midtest scores,  
308 reaching knowledge gains made by Group 1 students (Fig. 3). Knowledge gains by both  
309 Groups were overwhelmingly attributable to increased scores on the free-response  
310 section of the assessment. Average free-response scores from pretests to posttests  
311 increased by 18.09 points (48%) for Group 1 students and 20.59 points (54%) for Group  
312 2 students. In comparison, average multiple-choice scores increased by 1.07 points for  
313 Group 1 students and decreased by 0.54 points for Group 2 students. These results  
314 may indicate that EvolvingSTEM has a greater impact on improving students' higher-  
315 order cognitive skills, such as applying knowledge to an unknown problem and  
316 performing data analysis. There was no significant difference between Group 1 and 2  
317 posttest scores ( $t=0.14$ ,  $p=n.s.$ ), even though Group 2 students were provided more  
318 detailed verbal instruction and took one additional assessment. This result speaks to the  
319 power of EvolvingSTEM to increase student knowledge and suggests that our  
320 curriculum can serve to replace, rather than supplement, the standard evolution  
321 curriculum.

322

## 323 **Discussion**

324           We developed an inquiry-based, microbiology curriculum to improve the  
325 engagement of high school biology students with topics central to evolutionary biology  
326 and their subsequent understanding of related NGSS concepts. We observed high  
327 levels of engagement when students participated in our curriculum. Students  
328 recognized that success with the microbiology experiments required preparation, so  
329 they almost invariably completed their homework assignments. Teachers indicated that  
330 students who rarely participate in class-based discussions emerged as enthusiastic  
331 group leaders while performing the EvolvingSTEM experiment. Informal post-surveys of  
332 student attitudes towards the curriculum were overwhelmingly positive. Students  
333 indicated that they were enthusiastic about the bacterial model, enjoyed coming to class  
334 to work on the experiment, and felt that our curriculum was better at teaching them than  
335 the standard lecture-style class. The group format for the experiments and analyses

336 encouraged the students to collaborate and support one another throughout the  
337 program. Students tended to hold one another accountable, but also demonstrated  
338 cohesion when groups compared their replicate populations, demonstrating both  
339 friendly competition and pride and ownership in their results. Further, many students  
340 expressed that they felt like “real scientists” using equipment like pipettes, vortexes, and  
341 the incubator. They shared a greater sense of what science was actually like and asked  
342 more questions about microbiology and evolution research and other scientific careers.

343

344 Crucially, teachers found EvolvingSTEM to be effective at demonstrating  
345 evolution in action, thereby increasing student understanding of natural selection,  
346 mutation, and the effects of chance, and increasing student interest and engagement  
347 with biology. Student assessments also demonstrated the substantial benefit of our  
348 curriculum to student learning, and consequently, our curriculum replaced the standard  
349 WHS evolution curriculum in subsequent years. The sustainability of the EvolvingSTEM  
350 curriculum has been greatly facilitated by the involvement of returning students who  
351 demonstrated particular interest in the program and who served as *de facto* teaching  
352 assistants through an Extended Learning Opportunity program. (More information about  
353 this program will be the subject of a future report.) This teaching experience was made  
354 possible by engaging first-year students in laboratory research, which allowed them to  
355 help teach new students for up to three subsequent years prior to graduating.

356

357 We found that EvolvingSTEM provided students with significant learning benefits  
358 in comparison to standard curricula. After completing our curriculum, students achieved  
359 significantly higher scores on an knowledge assessment of evolution than students who  
360 had followed the standard curriculum. After completing our curriculum, students who  
361 were originally provided only the standard curriculum were able to further increase their  
362 assessment scores to meet the gains made by students who were taught evolution only  
363 with EvolvingSTEM. Our results demonstrate the power of microbial evolution  
364 experiments to effectively teach concepts in population genetics and evolution while  
365 also providing valuable experience in microbiology. Furthermore, EvolvingSTEM can

366 serve as an instructional foundation of other life science topics. For example, further  
367 investigations by students could identify the genetic mutations (using inexpensive  
368 whole-genome sequencing, i.e. (Cooper 2018)) that underlie the adaptive mutant  
369 phenotypes, supporting a greater understanding of inheritance and trait variation (NGSS  
370 HS-LS3). Previous research in our lab indicates that many commonly identified  
371 mutations are found in the *wsp* (wrinkly spreader phenotype) gene cluster (Cooper et al.  
372 2014; Gloag et al. 2018), which coordinates bacterial surface recognition with increased  
373 biofilm production (Hickman et al. 2005). Students are likely to identify *wsp* mutants in  
374 their classroom experiments and can therefore connect how changes in DNA can result  
375 in changes in protein structure and intracellular signaling that lead to increased biofilm  
376 production and changes to colony morphology, supporting a greater understanding of  
377 DNA, protein structure, and cellular function (NGSS HS-LS1). Furthermore, the bacterial  
378 adaptations are in response to environmental changes that provide new niches,  
379 supporting a greater understanding of interdependent relationships in ecosystems  
380 (NGSS HS-LS2). Classroom experiments that build upon the core evolution study can  
381 therefore span much of the NGSS-recommended introductory biology curriculum and  
382 also be readily adapted to cover more advanced topics for Advanced Placement  
383 Biology.

384

## 385 **Summary**

386 EvolvingSTEM is an engaging, inquiry-based curriculum that provides students  
387 with a hands-on approach to visualize evolutionary change occur in real time. It also can  
388 be delivered at a low cost per student (<\$5 in consumables) and is therefore potentially  
389 suitable for broad distribution. As evidence, it is being offered in 10 public and private  
390 high schools in 2019. Our curriculum provides students with the tools to understand  
391 evolutionary concepts and apply their knowledge to other areas of life science and  
392 medicine. For example, students can make a direct link between the adaptive  
393 phenotypes they see in the classroom for increased biofilm production and the nearly  
394 identical phenotypes seen in clinically relevant biofilm-associated bacterial infections. In  
395 addition, students are provided an introduction to microbiological techniques that have

396 important applications for biotechnology. A particularly powerful aspect of our curriculum  
397 is its positive effect on teacher and student engagement. Teachers and students  
398 embark on the research experiment together, which provides a collaborative classroom  
399 environment where both have the opportunity for greater understanding and discovery.  
400 EvolvingSTEM has exceptional ability to improve scientific literacy and the promise of  
401 promoting broad acceptance of evolution as a central, unifying theory for life science.

402

403

#### 404 **Acknowledgements**

405 We thank Stephen Hale from the University of New Hampshire for assistance in  
406 designing the assessment and Caroline Turner for critical feedback. This research was  
407 supported by NSF CAREER DEB-0845851, NASA CAN-7NNA15BB04A, and  
408 discretionary funds from the University of Pittsburgh, School of Medicine to VSC.

409

410

411



## 412 **References**

- 413 Alizon S, Méthot P-O. Reconciling Pasteur and Darwin to control infectious diseases.  
414 Read A, editor. *Plos Biol.* 2018 Jan 18;16(1):e2003815–12.
- 415 Ashish A, Paterson S, Mowat E, Fothergill JL, Walshaw MJ, Winstanley C. Extensive  
416 diversification is a common feature of *Pseudomonas aeruginosa* populations during  
417 respiratory infections in cystic fibrosis. *Journal of Cystic Fibrosis.* European Cystic  
418 Fibrosis Society; 2013 Dec 1;12(6):790–3.
- 419 Beardsley PM, Stuhsatz MAM, Kruse RA, Eckstrand IA, Gordon SD, Odenwald WF.  
420 *Evolution and Medicine: An Inquiry-Based High School Curriculum Supplement.*  
421 *Evolution: Education and Outreach.* 2nd ed. Springer; 2011 Oct 8;4(4):603–12.
- 422 Berendonk TU, Manaia CM, Merlin C, Fatta-Kassinos D, Cytryn E, Walsh F, et al.  
423 Tackling antibiotic resistance: the environmental framework. *Nature Publishing*  
424 *Group.* Nature Publishing Group; 2015 Mar 30;13(5):310–7.
- 425 Blount ZD, Lenski RE, Losos JB. Contingency and determinism in evolution: Replaying  
426 life's tape. *Science.* 2018 Nov 8;362(6415):eaam5979–12.
- 427 Broder ED, Angeloni LM, Simmons S, Warren S, Knudson KD, Ghalambor CK.  
428 Authentic Science with Live Organisms Can Improve Evolution Education. *The*  
429 *American Biology Teacher.* 2018 Jan 29;80(2):116–23.
- 430 Cooper VS. Experimental Evolution as a High-Throughput Screen for Genetic  
431 Adaptations. Gales AC, editor. *mSphere.* 2018 Jun 27;3(3):45–7.
- 432 Cooper VS, Staples RK, Traverse CC, Ellis CN. Parallel evolution of small colony  
433 variants in *Burkholderia cenocepacia* biofilms. *Genomics.* The Authors; 2014 Dec  
434 1;104(Part A):447–52.
- 435 Costerton JW, Cheng KJ, Geesey GG, Ladd TI, Nickel JC, Dasgupta M, et al. Bacterial  
436 biofilms in nature and disease. *Annual Review of Microbiology,* Vol 64, 2010.  
437 1987;41:435–64.
- 438 Crowe A, Dirks C, Wenderoth MP. *Biology in Bloom: Implementing Bloom's Taxonomy*  
439 *to Enhance Student Learning in Biology.* Sundberg M, editor. LSE. 2008  
440 Dec;7(4):368–81.
- 441 Cunningham DL, Wescott DJ. Still More “Fancy” and “Myth” than “Fact” in Students’  
442 Conceptions of Evolution. *Evolution: Education and Outreach.* Springer; 2009 Sep  
443 1;2(3):505–17.
- 444 Flynn KM, Dowell G, Johnson TM, Koestler BJ, Waters CM, Cooper VS. Evolution of  
445 Ecological Diversity in Biofilms of *Pseudomonas aeruginosa* by Altered Cyclic  
446 Diguanylate Signaling. O'Toole GA, editor. *J Bacteriol.* 2016 Sep 9;198(19):2608–

- 447 18.
- 448 Freeman S, Eddy SL, McDonough M, Smith MK, Okoroafor N, Jordt H, et al. Active  
449 learning increases student performance in science, engineering, and mathematics.  
450 Proc Natl Acad Sci USA. 2014 Jun 10;111(23):8410–5.
- 451 Glaze AL, Goldston MJ. US science teaching and learning of evolution: A critical review  
452 of the literature 2000–2014. Sci Ed. 2015;99(3):500–18.
- 453 Gloag ES, Marshall C, Snyder D, Lewin GR, Harris JS, Chaney SB, et al. The  
454 *Pseudomonas aeruginosa* Wsp pathway undergoes positive evolutionary selection  
455 during chronic infection. bioRxiv. 2018.
- 456 Greaves M, Maley CC. Clonal evolution in cancer. Nature. 2012 Jan 19;481(7381):306–  
457 13.
- 458 Green JH, Koza A, Moshynets O, Pajor R, Ritchie MR, Spiers AJ. Evolution in a test  
459 tube: rise of the Wrinkly Spreaders. Journal of Biological Education. 2011 Jan  
460 20;45(1):54–9.
- 461 Gregory TR. Understanding Natural Selection: Essential Concepts and Common  
462 Misconceptions. Evolution: Education and Outreach. 2nd ed. 2009 Apr 9;2(2):156–  
463 75.
- 464 Harrison JJ, Turner RJ, Ceri H. Persister cells, the biofilm matrix and tolerance to metal  
465 cations in biofilm and planktonic *Pseudomonas aeruginosa*. Environ Microbiol. 2005  
466 Jul;7(7):981–94.
- 467 Hickman JW, Tifrea, Harwood. A chemosensory system that regulates biofilm formation  
468 through modulation of cyclic diguanylate levels. PNAS. 2005.
- 469 Infanti LM, Wiles JR. “Evo in the News:” Understanding Evolution and Students’  
470 Attitudes toward the Relevance of Evolutionary Biology. Bioscene. 2014.
- 471 Jordan TC, Burnett SH, Carson S, Caruso SM, Clase K, DeJong RJ, et al. A Broadly  
472 Implementable Research Course in Phage Discovery and Genomics for First-Year  
473 Undergraduate Students. MBio. 2014;5(1):493–8.
- 474 Karatan E, Watnick P. Signals, Regulatory Networks, and Materials That Build and  
475 Break Bacterial Biofilms. Microbiol Mol Biol Rev. 2009 Jun 1;73(2):310–47.
- 476 Knott GJ, Doudna JA. CRISPR-Cas guides the future of genetic engineering. Science.  
477 2018.
- 478 Makarova KS, Wolf YI, Alkhnbashi OS, Costa F, Shah SA, Saunders SJ, et al. An  
479 updated evolutionary classification of CRISPR–Cas systems. Nature Publishing  
480 Group. Nature Publishing Group; 2015 Sep 28;13(11):722–36.

- 481 Makohon-Moore A, Iacobuzio-Donahue CA. Pancreatic cancer biology and genetics  
482 from an evolutionary perspective. Nature Publishing Group. Nature Publishing  
483 Group; 2016 Jul 22;16(9):553–65.
- 484 Martin M, Hölscher T, Dragoš A, Cooper VS, Kovács ÁT. Laboratory Evolution of  
485 Microbial Interactions in Bacterial Biofilms. O'Toole GA, editor. J Bacteriol. 2016 Sep  
486 9;198(19):2564–71.
- 487 National Research Council. A framework for K-12 science education: Practices,  
488 crosscutting concepts, and core ideas. Washington, DC: The National Academies  
489 Press; 2012.
- 490 Nehm RH, Reilly L. Biology Majors' Knowledge and Misconceptions of Natural  
491 Selection. BioScience. Oxford University Press; 2007 Mar 1;57(3):263–72.
- 492 Nelson CE. Teaching evolution (and all of biology) more effectively: Strategies for  
493 engagement, critical reasoning, and confronting misconceptions. Integrative and  
494 Comparative Biology. 2008 Jun 21;48(2):213–25.
- 495 NGSS Lead States. Next generation science standards: For states, by states.  
496 Washington, DC: The National Academies Press; 2013.
- 497 NSTA. NSTA Position Statement: The Teaching of Evolution. 2013 Jul 30;;1–7.
- 498 O'Rourke D, FitzGerald CE, Traverse CC, Cooper VS. There and back again:  
499 consequences of biofilm specialization under selection for dispersal. Front Genet.  
500 Frontiers; 2015;6(e225).
- 501 Pobiner B. Accepting, understanding, teaching, and learning (human) evolution:  
502 Obstacles and opportunities. Am J Phys Anthropol. 3rd ed. 2016 Jan  
503 25;159(3):232–74.
- 504 Poltak SR, Cooper VS. Ecological succession in long-term experimentally evolved  
505 biofilms produces synergistic communities. The ISME Journal. Nature Publishing  
506 Group; 2011;5(3):369–78.
- 507 Rainey P, Buckling A, Kassen R, TRAVISANO M. The emergence and maintenance of  
508 diversity: insights from experimental bacterial populations. Trends in Ecology &  
509 Evolution. 2000 Jun;15(6):243–7.
- 510 Rainey PB, Travisano M. Adaptive radiation in a heterogeneous environment. Nature.  
511 1998.
- 512 Ratcliff WC, Raney A, Westreich S, Cotner S. A novel laboratory activity for teaching  
513 about the evolution of multicellularity. The American Biology Teacher.  
514 2014;76(2):81–7.

- 515 Romine WL, Walter EM, Bosse E, Todd AN. Understanding patterns of evolution  
516 acceptance-A new implementation of the Measure of Acceptance of the Theory of  
517 Evolution (MATE) with Midwestern university students. *J Res Sci Teach.* 2nd ed.  
518 2017 Jan 12;54(5):642–71.
- 519 Sickel AJ, Friedrichsen P. Examining the evolution education literature with a focus on  
520 teachers: major findings, goals for teacher preparation, and directions for future  
521 research. *Evolution: Education and Outreach.* 2nd ed. 2013 Jul 5;6(1):1105–15.
- 522 Smith MU. Current Status of Research in Teaching and Learning Evolution: I.  
523 Philosophical/Epistemological Issues. *Sci & Educ.* Springer Netherlands;  
524 2010a;19(6-8):523–38.
- 525 Smith MU. Current Status of Research in Teaching and Learning Evolution: II.  
526 Pedagogical Issues. *Sci & Educ.* 2nd ed. 2010b;19(6-8):539–71.
- 527 Spiers AJ. The *Pseudomonas fluorescens* SBW25 wrinkly spreader biofilm requires  
528 attachment factor, cellulose fibre and LPS interactions to maintain strength and  
529 integrity. *Microbiology.* 2005 Sep 1;151(9):2829–39.
- 530 Spiers AJ. Getting Wrinkly Spreaders to demonstrate evolution in schools. *Trends in*  
531 *Microbiology.* Elsevier Ltd; 2014 Jun 1;22(6):301–3.
- 532 Starkey M, Hickman JH, Ma L, Zhang N, De Long S, Hinz A, et al. *Pseudomonas*  
533 *aeruginosa* rugose small-colony variants have adaptations that likely promote  
534 persistence in the cystic fibrosis lung. *J Bacteriol. American Society for Microbiology*  
535 *Journals;* 2009 Jun;191(11):3492–503.
- 536 Traverse CC, Mayo-Smith LM, Poltak SR, Cooper VS. Tangled bank of experimentally  
537 evolved *Burkholderia* biofilms reflects selection during chronic infections. *Proc Natl*  
538 *Acad Sci USA.* 2013;110(3):E250–9.
- 539 Turner, Marshall CW, Cooper VS. Parallel genetic adaptation across environments  
540 differing in mode of growth or resource availability. *Evolution Letters.* Wiley-  
541 Blackwell; 2018 Aug 4;2(4):355–67.
- 542 Wells J, Nesse RM, Sear R, Johnstone RA, Stearns SC. Evolutionary public health:  
543 introducing the concept. *The Lancet.* 2017.
- 544 Wiggins G, McTighe. *Understanding by Design (Expanded 2nd Ed.)* Alexandria: VA:  
545 ASCD. 2005.
- 546 Yates TB, Marek EA. Teachers teaching misconceptions: a study of factors contributing  
547 to high school biology students' acquisition of biological evolution-related  
548 misconceptions. *Evolution: Education and Outreach.* 2nd ed. 2014 Mar 15;7(1):1–  
549 18.

550 Zoller U. Are lecture and learning compatible? Maybe for LOCS: Unlikely for HOCS. J  
551 Chem Educ. 1993 Mar;70(3):195–3.

552
